# Supplementary material
Source: PubMed Central journal article supplement (PMC6720105)
Supplement: NIHMS1047692-supplement-Supplementary_Table_1.pdf [file NIHMS1047692-supplement-Supplementary_Table_1.pdf]

Supplementary Table 1: Genetic alterations identified in RMS cases analyzed by Targeted exom

| Case # | Targeted Exome Sequencing (MSK-IMPACT) alterations                                                                                                                                                                                                                                                                                                                                                                                                                                                                                                                                                                                                                                                                                                                                                                                |
|--------|-----------------------------------------------------------------------------------------------------------------------------------------------------------------------------------------------------------------------------------------------------------------------------------------------------------------------------------------------------------------------------------------------------------------------------------------------------------------------------------------------------------------------------------------------------------------------------------------------------------------------------------------------------------------------------------------------------------------------------------------------------------------------------------------------------------------------------------|
| 3      | <ol style="list-style-type: none"> <li>1. NRAS (NM_002524) exon3 p.Q61L (c.182A&gt;T)</li> <li>2. HIST2H3D (NM_001123375 - 1q21.2) Amplification (Fold Change: 2.1)</li> <li>3. HIST2H3C (NM_021059 - 1q21.2) Amplification (Fold Change: 2.1)</li> <li>4. PTEN (NM_000314 - 10q23.31) Deletion (Fold Change: -8.7)</li> <li>5. NTRK2 (NM_006180 - 9q21.33) Loss (Fold Change: -1.7)</li> <li>6. MYOD1 (NM_002478) exon1 p.L122R (c.365T&gt;G)</li> </ol>                                                                                                                                                                                                                                                                                                                                                                         |
| 4      | <ol style="list-style-type: none"> <li>1. BMPR1A (NM_004329 - 10q23.2) Intragenic deletion</li> <li>2. MYOD1 (NM_002478) exon1 p.L122R (c.365T&gt;G)</li> <li>3. PTEN (NM_000314) exon1 p.V9fs (c.24_27delCGTT)</li> </ol>                                                                                                                                                                                                                                                                                                                                                                                                                                                                                                                                                                                                        |
| 9      | <ol style="list-style-type: none"> <li>1. MYOD1 exon 1 p.L122R</li> <li>2. PIK3CA exon 21 p. G1049R</li> <li>2. FGFR4 p V548M</li> </ol>                                                                                                                                                                                                                                                                                                                                                                                                                                                                                                                                                                                                                                                                                          |
| 15     | <ol style="list-style-type: none"> <li>1. MYOD1 (NM_002478) exon1 p.L122R (c.365T&gt;G)</li> <li>2. PIK3R3 (NM_003629) exon1 p.T4fs (c.11_25delinsAATA)</li> <li>3. IGF2 (NM_001127598 - 11p15.5) Amplification (Fold Change: 2.2)</li> <li>4. MAX (NM_002382 - 14q23.3) Loss (Fold Change: -1.6)</li> <li>5. FBXW7 (NM_033632) exon11 p.616_618del (c.1842_1850delACAAACATT)</li> </ol>                                                                                                                                                                                                                                                                                                                                                                                                                                          |
| 16     | <ol style="list-style-type: none"> <li>1. NPM1 (NM_002520 - 5q35.1) Amplification (Fold Change: 2.2)</li> <li>2. FANCC (NM_000136 - 9q22.32) Amplification (Fold Change: 2.1)</li> <li>3. IGF2 (NM_001127598 - 11p15.5) Amplification (Fold Change: 6.3)</li> <li>4. MYOD1 (NM_002478 - 11p15.1) Amplification (Fold Change: 2.0)</li> <li>5. IGF1 (NM_001111285 - 12q23.2) Amplification (Fold Change: 2.3)</li> <li>6. ICOSLG (NM_015259 - 21q22.3) Amplification (Fold Change: 2.2)</li> <li>7. CFBF (NM_022845 - 16q22.1) Deletion (Fold Change: -1.9)</li> <li>8. NF1 (NM_001042492 - 17q11.2) Deletion (Fold Change: -1.9)</li> <li>9. MYOD1 (NM_002478) exon1 p.L122R (c.365T&gt;G)</li> <li>10. NOTCH1 (NM_017617) exon20 p.Y1093H (c.3277T&gt;C)</li> <li>11. POLE (NM_006231) exon43 p.C1992S (c.5975G&gt;C)</li> </ol> |
| 17     | <ol style="list-style-type: none"> <li>1. PIK3CA (NM_006218) exon21 p.M1043V (c.3127A&gt;G)</li> <li>2. FGFR4 (NM_213647 - 5q35.2) Amplification (Fold Change: 6.0)</li> <li>3. NSD1 (NM_022455 - 5q35.3) Amplification (Fold Change: 2.8)</li> <li>4. NPM1 (NM_002520 - 5q35.1) Gain (Fold Change: 1.9)</li> <li>5. RAD51 (NM_002875 - 15q15.1) Deletion (Fold Change: -2.4)</li> <li>6. MGA (NM_001164273 - 15q15.1) Deletion (Fold Change: -2.4)</li> <li>7. B2M (NM_004048 - 15q21.1) Deletion (Fold Change: -2.4)</li> <li>8. FGFR4 (NM_213647) exon13 p.V550L (c.1648G&gt;T)</li> <li>9. IL7R (NM_002185) exon8 splicing variant (c.877-1G&gt;C)</li> <li>10. MYOD1 (NM_002478) exon1 p.L122R (c.365T&gt;G)</li> </ol>                                                                                                      |
| 19     | <ol style="list-style-type: none"> <li>1. PIK3CA (NM_006218) exon21 p.H1047R (c.3140A&gt;G)</li> <li>2. GATA3 (NM_002051 - 10p14) Loss (Fold Change: -1.6)</li> <li>3. MYOD1 (NM_002478) exon1 p.L122R (c.365T&gt;G)</li> </ol>                                                                                                                                                                                                                                                                                                                                                                                                                                                                                                                                                                                                   |
| 20     | <ol style="list-style-type: none"> <li>1. PIK3CA (NM_006218) exon2 p.K111E (c.331A&gt;G)</li> <li>2. IGF2 (NM_001127598 - 11p15.5) Amplification (Fold Change: 2.0)</li> <li>3. CDKN2B (NM_004936 - 9p21.3) Deletion (Fold Change: -7.2)</li> </ol>                                                                                                                                                                                                                                                                                                                                                                                                                                                                                                                                                                               |

|    |                                                                                                                                                                                                                                                                                                                                                                                                                                                                                                                                                                                                                                                                                                                                                                                                                                                                                                                                                                                                                                                                                                                                                                                                                                                                                                                                                                                                                                                   |
|----|---------------------------------------------------------------------------------------------------------------------------------------------------------------------------------------------------------------------------------------------------------------------------------------------------------------------------------------------------------------------------------------------------------------------------------------------------------------------------------------------------------------------------------------------------------------------------------------------------------------------------------------------------------------------------------------------------------------------------------------------------------------------------------------------------------------------------------------------------------------------------------------------------------------------------------------------------------------------------------------------------------------------------------------------------------------------------------------------------------------------------------------------------------------------------------------------------------------------------------------------------------------------------------------------------------------------------------------------------------------------------------------------------------------------------------------------------|
|    | <p>4. CDKN2Ap16INK4A (NM_000077 - 9p21.3) Deletion (Fold Change: -7.2)</p> <p>5. CDKN2Ap14ARF (NM_058195 - 9p21.3) Deletion (Fold Change: -7.2)</p> <p>6. IFNGR1 (NM_000416 - 6q23.3) Loss (Fold Change: -1.9) ()</p> <p>7. TNFAIP3 (NM_006290 - 6q23.3) Loss (Fold Change: -1.9) ()</p> <p>8. RAD51B (NM_133509 - 14q24.1) Loss (Fold Change: -1.8) ()</p> <p>9. RAD51 (NM_002875 - 15q15.1) Loss (Fold Change: -1.8) ()</p> <p>10. MGA (NM_001164273 - 15q15.1) Loss (Fold Change: -1.8) ()</p> <p>11. B2M (NM_004048 - 15q21.1) Loss (Fold Change: -1.8) ()</p> <p>12. SPEN (NM_015001 - 1p36.13) Loss (Fold Change: -1.7) ()</p> <p>13. ARID1B (NM_020732) exon1 p.A363V (c.1088C&gt;T)</p> <p>14. ARID5B (NM_032199) exon10 p.S705Y (c.2114G&gt;A)</p> <p>15. CHEK2 (NM_007194) exon4 p.I157T (c.470T&gt;C)</p> <p>16. H3F3A (NM_002107) exon3 p.L61F (c.181C&gt;T)</p> <p>17. IKBKE (NM_014002) exon12 p.Q424R (c.1271A&gt;G)</p> <p>18. MAP3K1 (NM_005921) exon16 p.E1286V (c.3857A&gt;T)</p> <p>19. MLL2 (NM_003482) exon48 p.E5251Rfs*24 (c.15751delG)</p> <p>20. MYOD1 (NM_002478) exon1 p.L122R (c.365T&gt;G)</p> <p>21. NOTCH4 (NM_004557) exon5 splicing variant (c.800-3C&gt;T)</p> <p>22. ROS1 (NM_002944) exon24 p.E1265Q (c.3793G&gt;C)</p> <p>23. SMARCB1 (NM_003073) exon9 p.R377H (c.1130G&gt;A)</p> <p>24. STAT5A (NM_003152) exon20 p.D747N (c.2239G&gt;A)</p> <p>25. TMEM127 (NM_001193304) exon3 p.R94Q (c.281G&gt;A)</p> |
| 23 | <p>1. PIK3CA (NM_006218) exon2 p.K1111del (c.332_334delAGA)</p> <p>2. MDM2 (NM_002392 - 12q15) Amplification (Fold Change: 4.4)</p> <p>3. BCOR (NM_001123385) exon8 p.S1271fs (c.3812delinsTT)</p> <p>4. MYOD1 (NM_002478) exon1 p.L122R (c.365T&gt;G)</p>                                                                                                                                                                                                                                                                                                                                                                                                                                                                                                                                                                                                                                                                                                                                                                                                                                                                                                                                                                                                                                                                                                                                                                                        |
| 26 | <p>1. IGF2 (NM_001127598 - 11p15.5) Amplification (Fold Change: 4.0)</p> <p>2. BRCA2 (NM_000059 - 13q13.1) Gain (Fold Change: 1.9) ()</p> <p>3. MYOD1 (NM_002478) exon1 p.L122R (c.365T&gt;G)</p>                                                                                                                                                                                                                                                                                                                                                                                                                                                                                                                                                                                                                                                                                                                                                                                                                                                                                                                                                                                                                                                                                                                                                                                                                                                 |
| 27 | <p>1. MDM2 (NM_002392 - 12q15) Amplification (Fold Change: 21.3)</p> <p>2. GATA3 (NM_002051 - 10p14) Deletion (Fold Change: -2.8)</p> <p>3. ARID1B (NM_020732) exon5 p.E665D (c.1995A&gt;T)</p> <p>4. CHEK2 (NM_007194) exon11 p.T367Mfs*15 (c.1100delC)</p> <p>5. MYOD1 (NM_002478) exon1 p.L122R (c.365T&gt;G)</p> <p>6. PLCG2 (NM_002661) exon9 p.P236L (c.707C&gt;T)</p> <p>7. SPEN (NM_015001) exon11 p.L3093V (c.9277C&gt;G)</p>                                                                                                                                                                                                                                                                                                                                                                                                                                                                                                                                                                                                                                                                                                                                                                                                                                                                                                                                                                                                            |
